# Supplementary material for: A simple approach for an optically transparent nanochannel device prototype
Source: Royal Society of Chemistry journal article supplement (doi:10.1039/c6lc00152a), 2016-01-01
Supplement: c6lc00152a1.pdf [file c6lc00152a1.pdf]

## Supporting Information

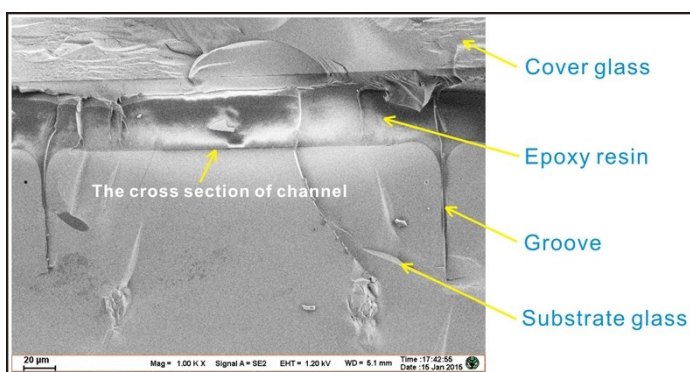

**Fig. S1** SEM cross-section picture of the whole three-layer structure of the nanochannel. The cross-section was obtained by breaking off the nanochannel device mechanically.

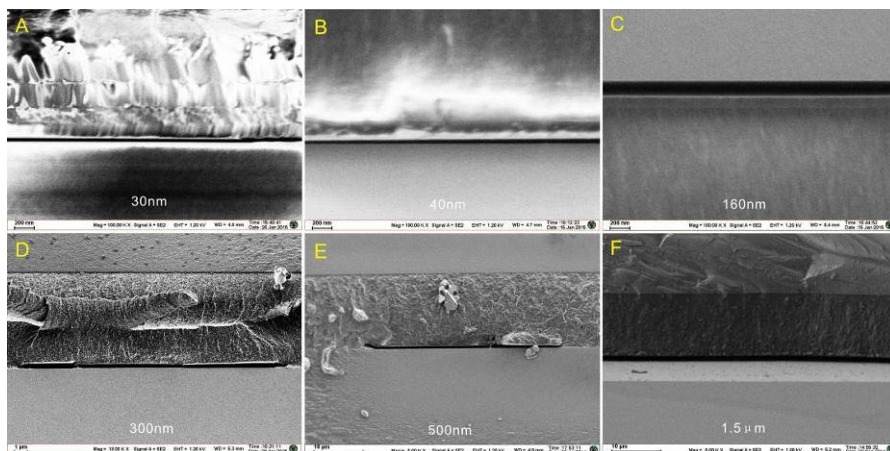

**Fig. S2** SEM images of cross-sections of the nanochannels with the depth of 30,40,160, 300,500 nm, and 1.5  $\mu$  m.

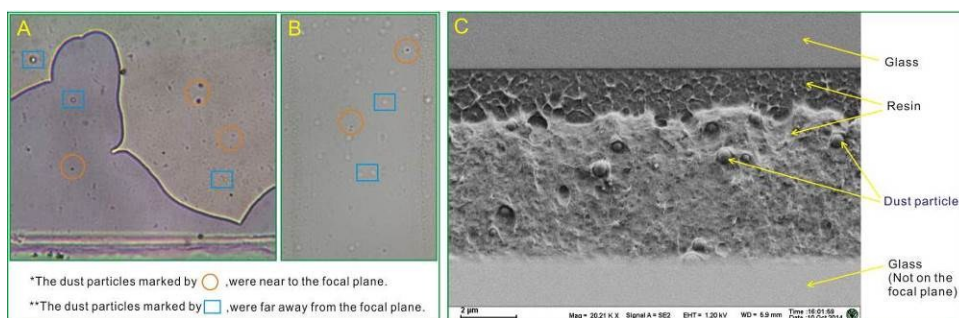

**Fig. S3** Images of dust particles. (A) and (B) the dust particles were on the background of nanochannels under optical microscopy; (C) the dust particles were wrapped by the resin in SEM image of the cross-section of resin.

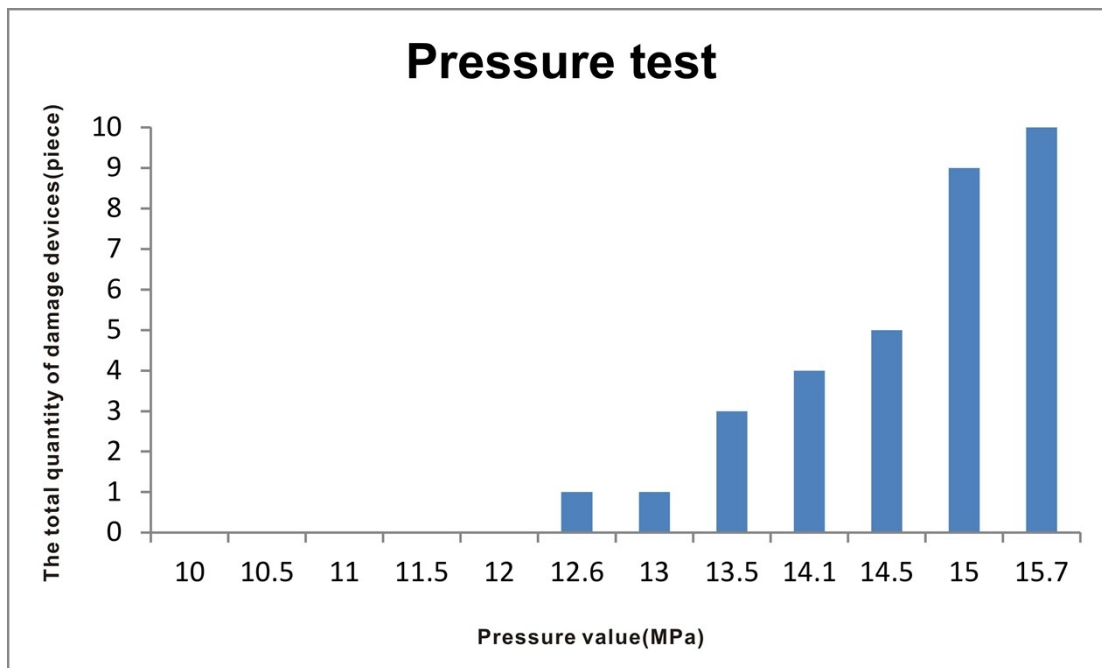

**Fig. S4** Pressure test of 10 pieces of nanochannel devices. High-pressure water was pumping into the nanochannels, and measured the corresponding destruction pressure. No nanochannel was damaged under the pressure below 12.5 MPa.

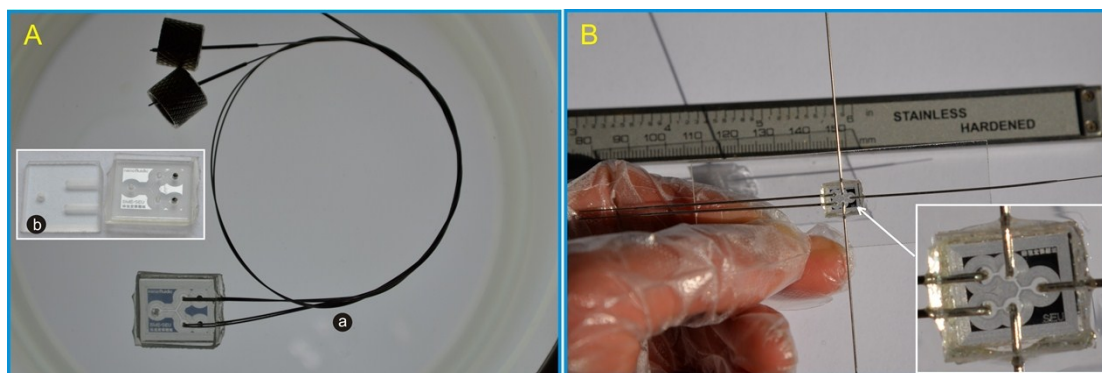

**Fig. S5** Nanochannel devices mounted with stainless steel capillaries. (A) mounting method with stainless steel pipes, nanochannel device mounted with the pipes(a) and the device before mounting (b); (B) mounting method with concentric stainless steel pipes in which a smaller inner pipe embedded in a larger pipe.

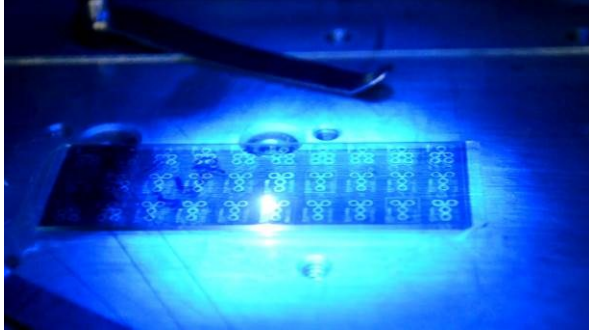

**Video S1.** Fabrication of nanochannel device. Part I (from 0' 5" to 1' 35" ): Manufacturing specific shape of the aluminum sacrificial layer by laser engraving. Part II (from 1' 37" to 1' 49" ): Animation of the whole fabrication process of the nanochannel device.

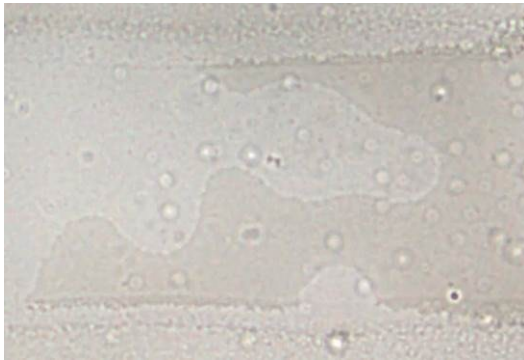

**Video S2.** Experiments based on nanochannel devices. Part I (from 0' 5" to 6' 12" ): Evaporation process in the nanochannel. Part II (from 6' 14" to 6' 39" ): The water flow through the nanochannel driven by capillary force. Part III (from 6' 41" to 7' 23" ): The flow of aqueous solution of fluorescein sodium through the nanochannel between two microchannels.

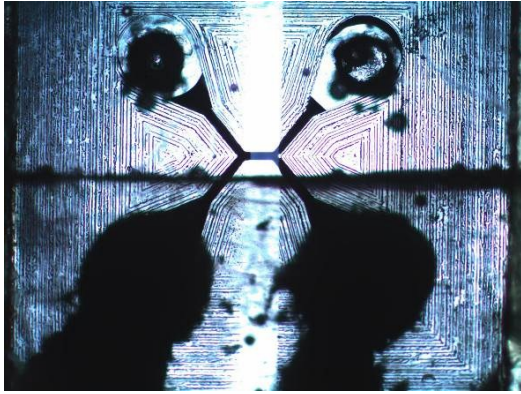

**Video S3.** Etching Process of Sacrificial Layers. Part I (from 0' 5" to 5' 55" ) and Part II (from 5' 57" to 6' 42" ): Electrolysis of aluminum sacrificial layers with the thickness of 20nm. Part III (from 6' 44" to 10' 18" ): Electrolysis of aluminum sacrificial layer with the thicknesses including both micro- and nano-scales.
